# Supplementary material for: An in situ self-assembled core–shell precursor route to prepare ultrasmall copper nanoparticles on silica catalysts
Source: Royal Society of Chemistry journal article supplement (doi:10.1039/c3ta14592a), 2014-01-01
Supplement: c3ta14592a1.pdf [file c3ta14592a1.pdf]

Electronic Supplementary Information (ESI)  
In-situ Self-Assembled Core-Shell Precursor  
Route to Prepare Ultrasmall Copper  
Nanoparticles on Silica Catalysts

*Liuye Mo and Sibudjing Kawi\**

Department of Chemical and Biomolecular Engineering, National University of  
Singapore, Singapore 117576

**Corresponding Author**

Fax: (+65)65166312; E-mail: [chekawis@nus.edu.sg](mailto:chekawis@nus.edu.sg) (S. Kawi)

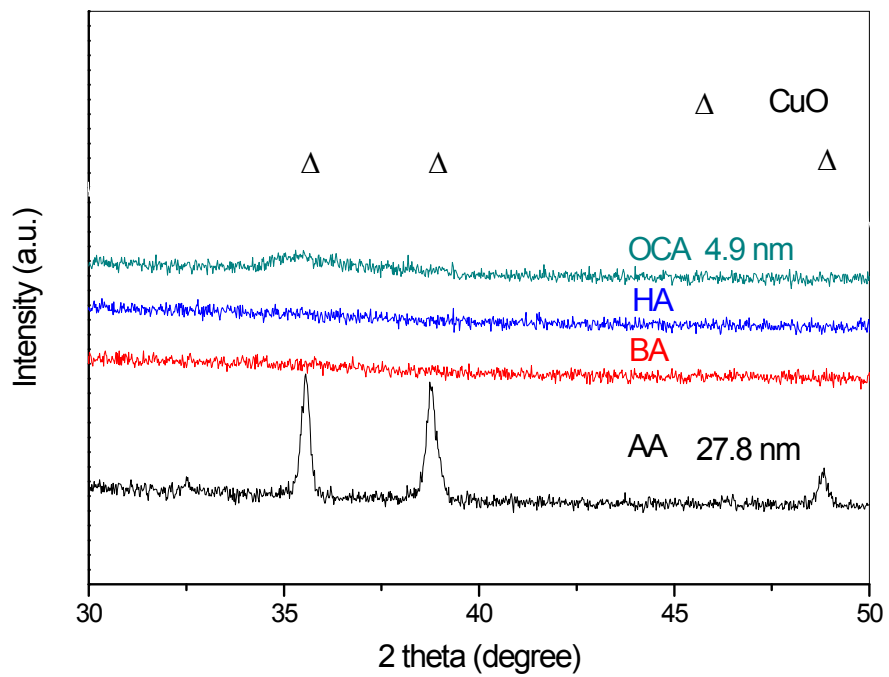

**Figure S1.** XRD patterns of 10%Cu/SiO<sub>2</sub> catalysts prepared in presence of different FAs.

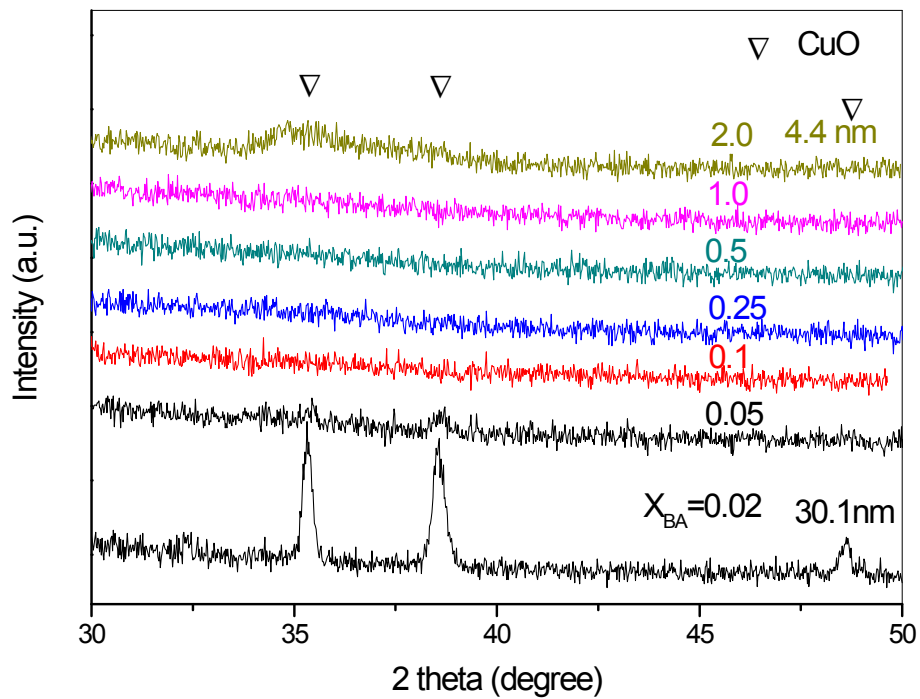

**Figure S2.** XRD patterns of 10%Cu/SiO<sub>2</sub> catalysts prepared with different  $X_{BA}$ .

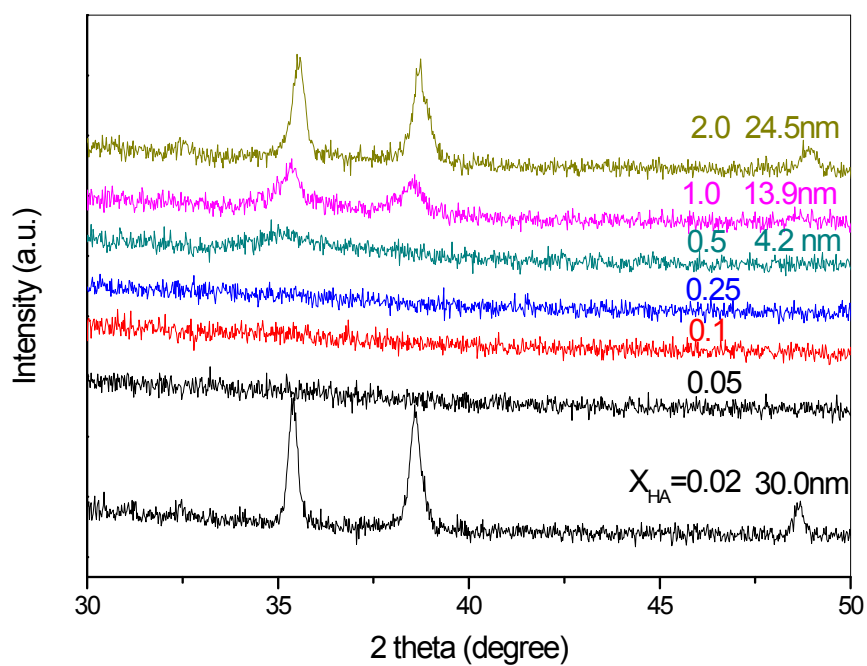

**Figure S3.** XRD patterns of 10%Cu/SiO<sub>2</sub> catalysts prepared with different  $X_{HA}$ .
